# Supplementary material
Source: ML conference proceedings conference paper supplement (https://openaccess.thecvf.com/content/cvpr_2017/html/Santhanam_Generalized_Deep_Image_2017_CVPR_paper.html)
Supplement: Supplementary file 1 [file Santhanam_Generalized_Deep_Image_2017_CVPR_supplemental.pdf]

# Generalized Deep Image to Image Regression

Supplementary Material for CVPR17 submission # 2384

Venkataraman Santhanam, Vlad I. Morariu, Larry S. Davis

UMIACS

University of Maryland, College Park

[venkai,morariu,lsd]@umiacs.umd.edu

April 10, 2017

|             | <b>DnCNN</b> | <b>RBDN</b> |        |        |        |        |
|-------------|--------------|-------------|--------|--------|--------|--------|
|             | [1]          | $B_0$ ONLY  | 1-BR   | 2-BR   | 3-BR   | 4-BR   |
| # of params | 739584       | 343424      | 491264 | 639104 | 786944 | 934784 |
| Memory(GB)  | 19.75        | 5.12        | 6.20   | 6.58   | 6.78   | 6.93   |

Table 1: Training with batch size: 128, input size: 128x128

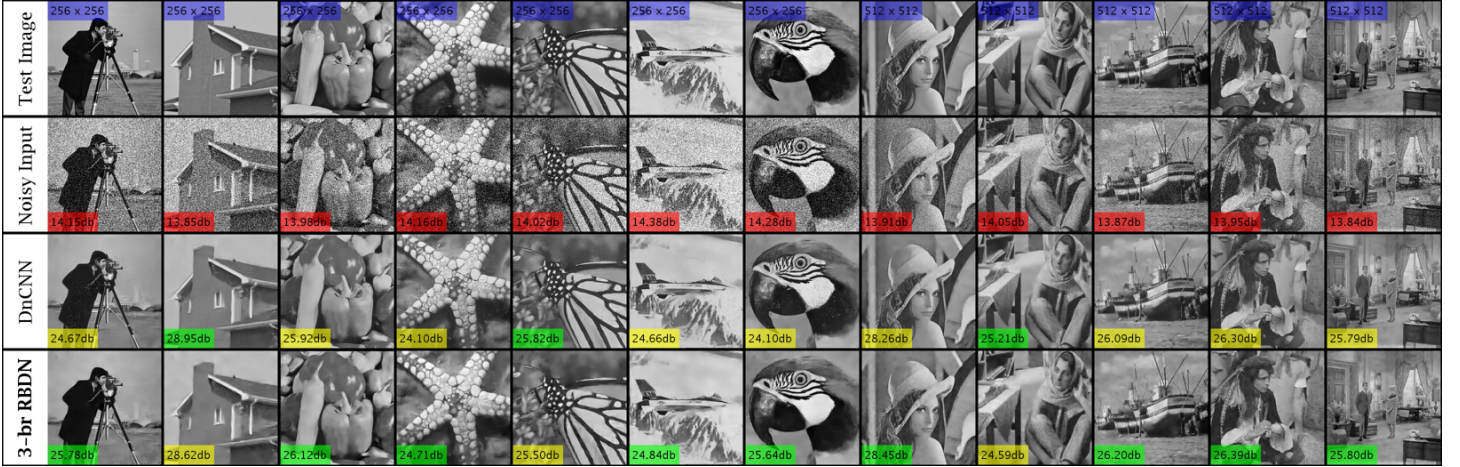

Figure 1: Denoising at  $\sigma = 55$  for 12 commonly used test images, outside our training bounds ( $\sigma \in [8, 50]$ ) for the 3-branch RBDN and DnCNN [1]. Red, Yellow, Green boxes show the PSNR.

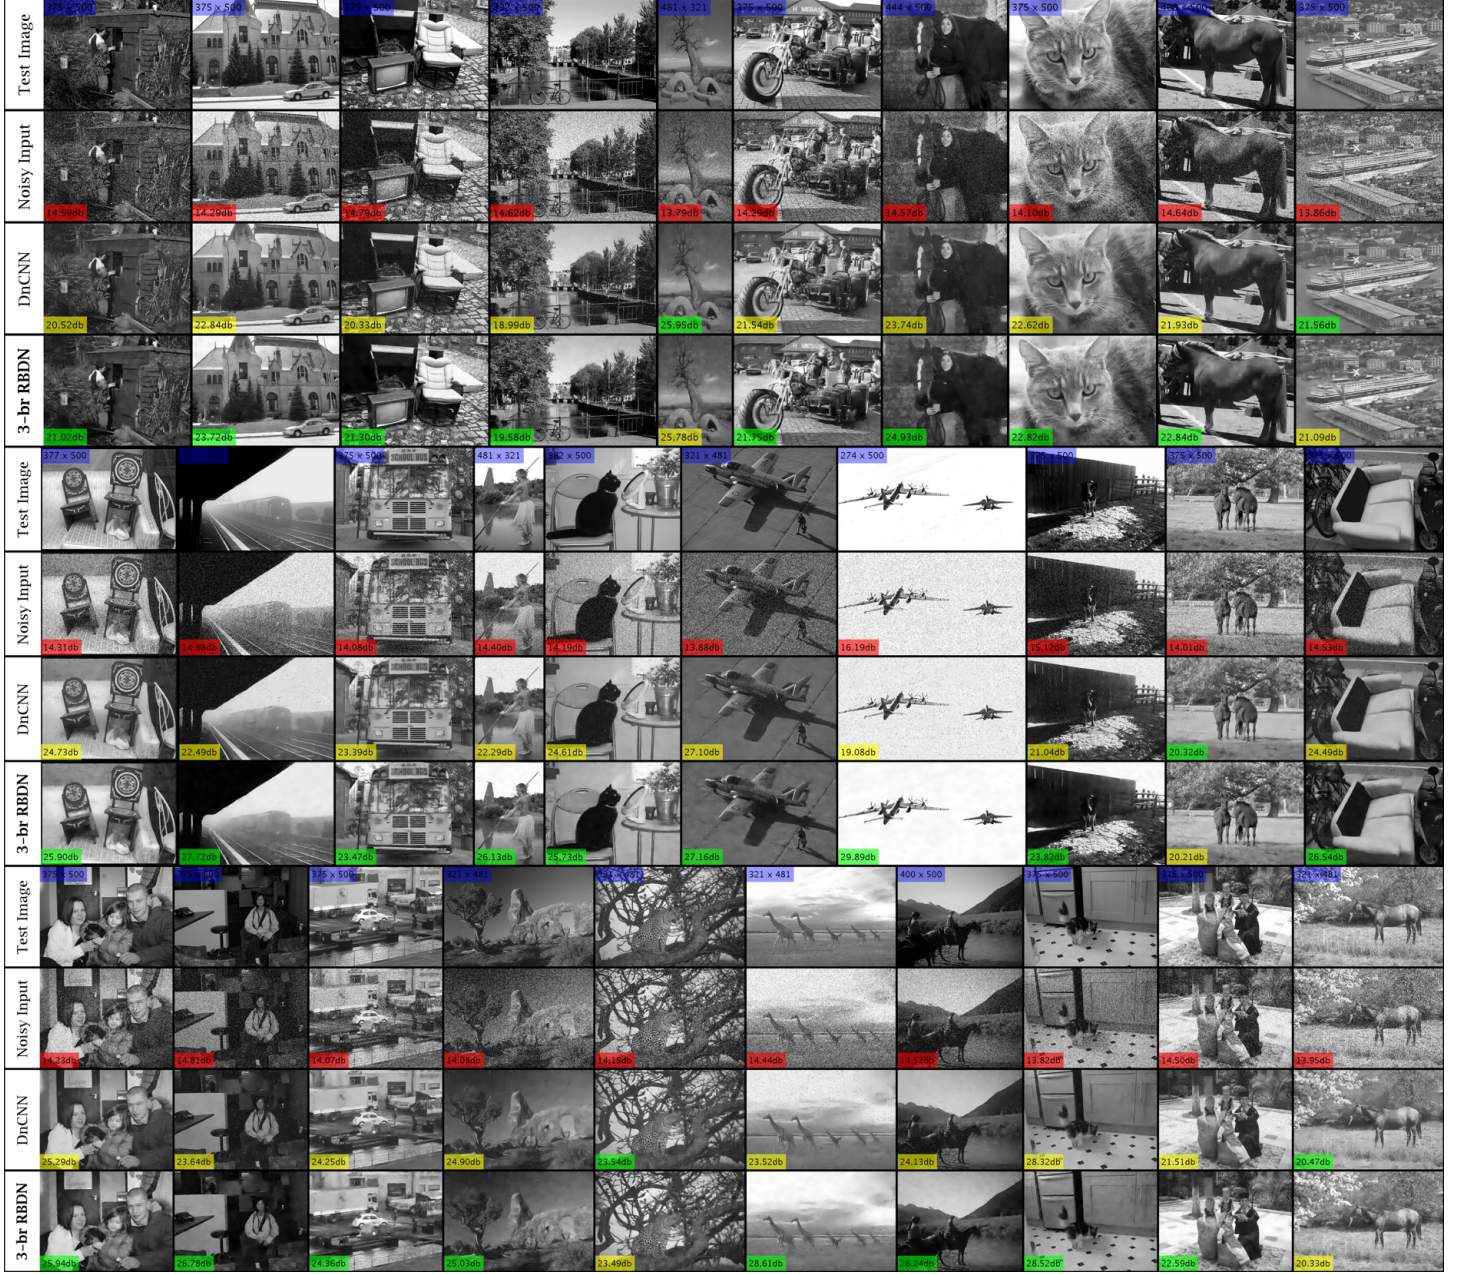

Figure 2: Denoising at  $\sigma = 55$  for test images from BSD300 [2], outside our training bounds ( $\sigma \in [8, 50]$ ) for the 3-branch RBDN and DnCNN [1]. Red, Yellow, Green boxes show the PSNR.



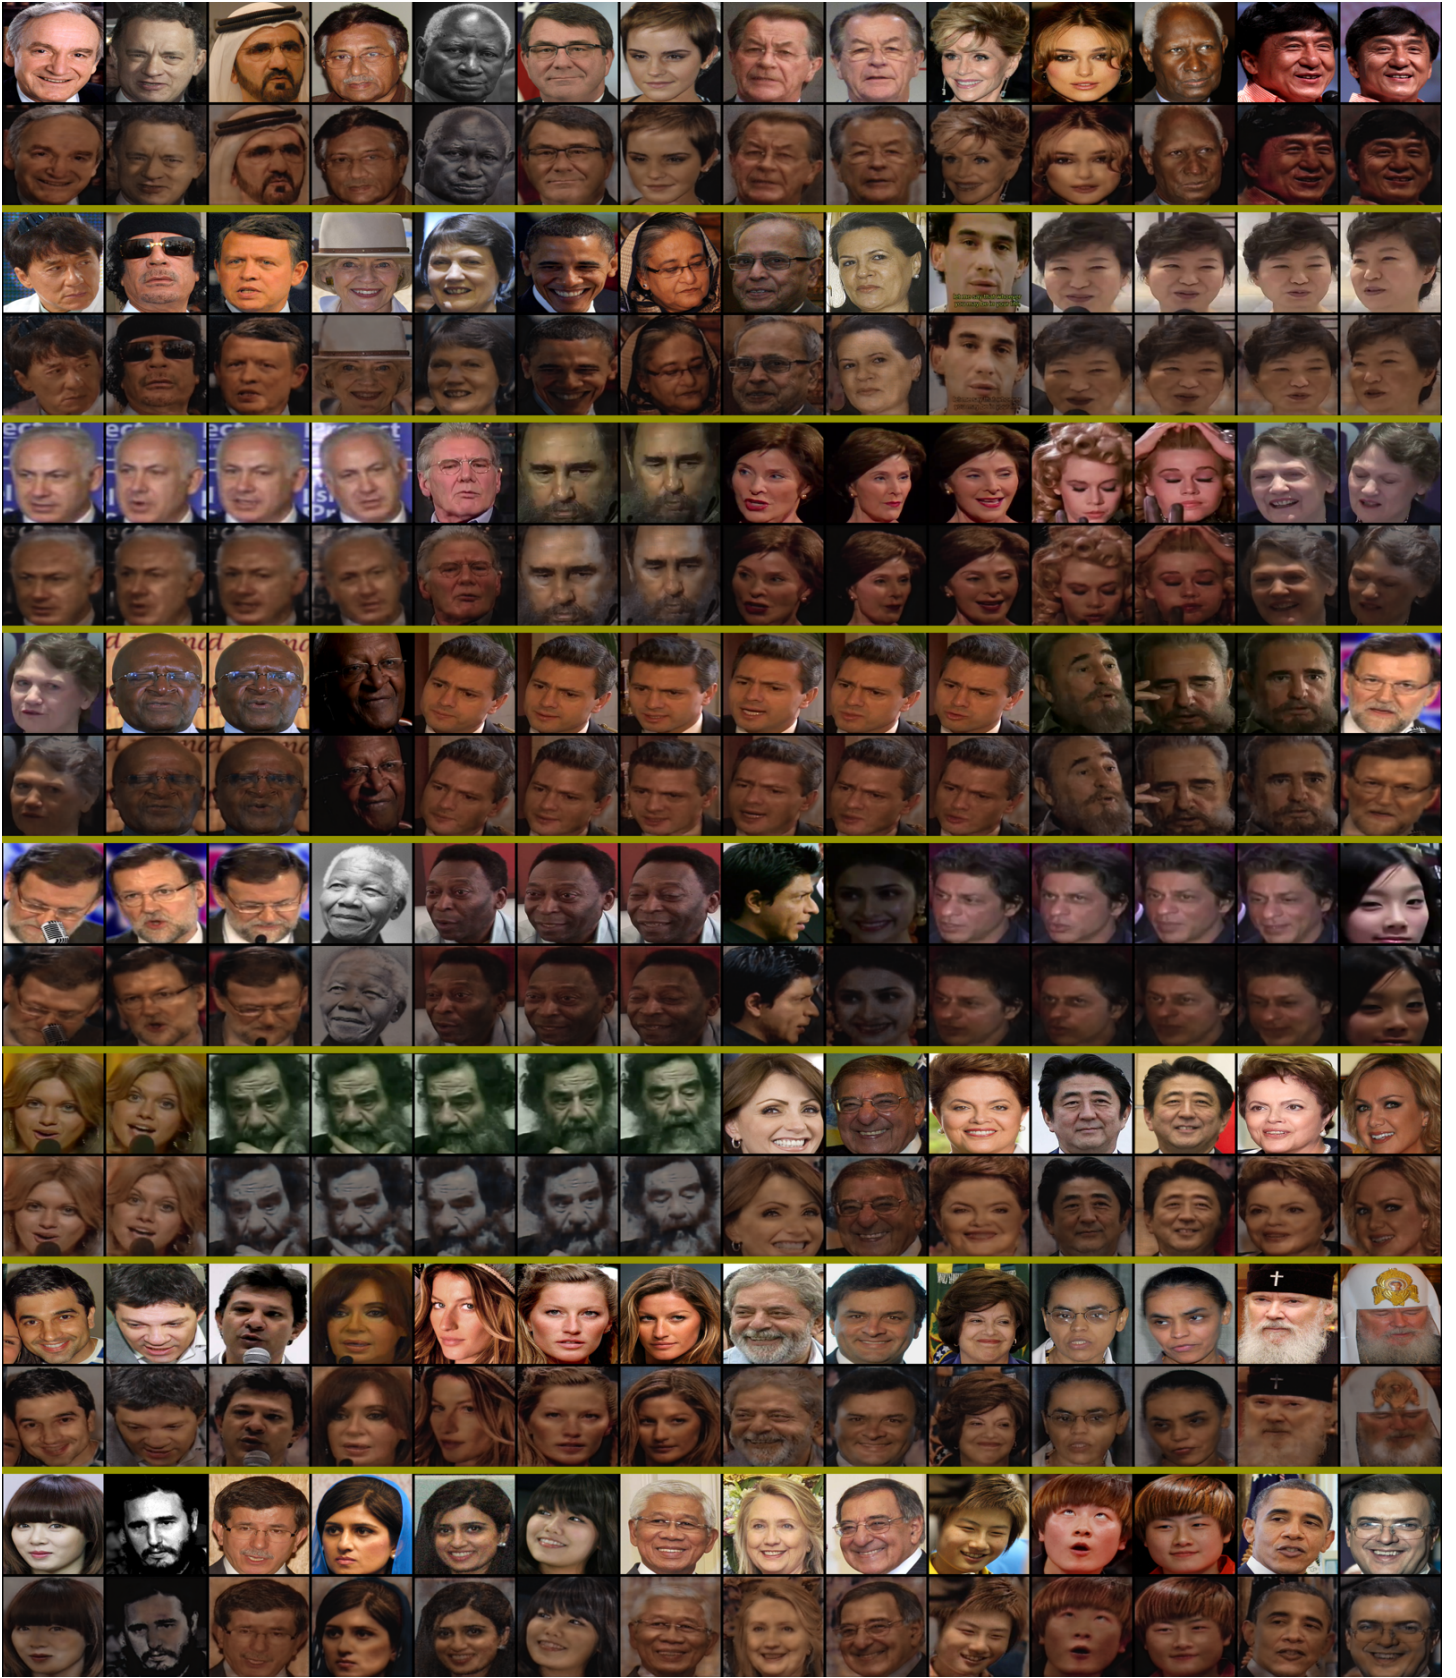

Figure 3: Relighting results on images from the **Janus CS0** [3] dataset. The goal is to render faces from various unknown lighting conditions to a fixed lighting condition. **Odd rows:** Inputs, **Even Rows:** 3-branch RBDN output. Note that the model is trained exclusively on *frontal* face images with *constrained* illumination variations from the **CMU-MultiPie** [4] dataset, but still generalizes reasonably well to *unconstrained* face images under a variety of *poses*, *illuminations*, *expressions*, *occlusions*, *affordances* (hats, glasses, etc.)



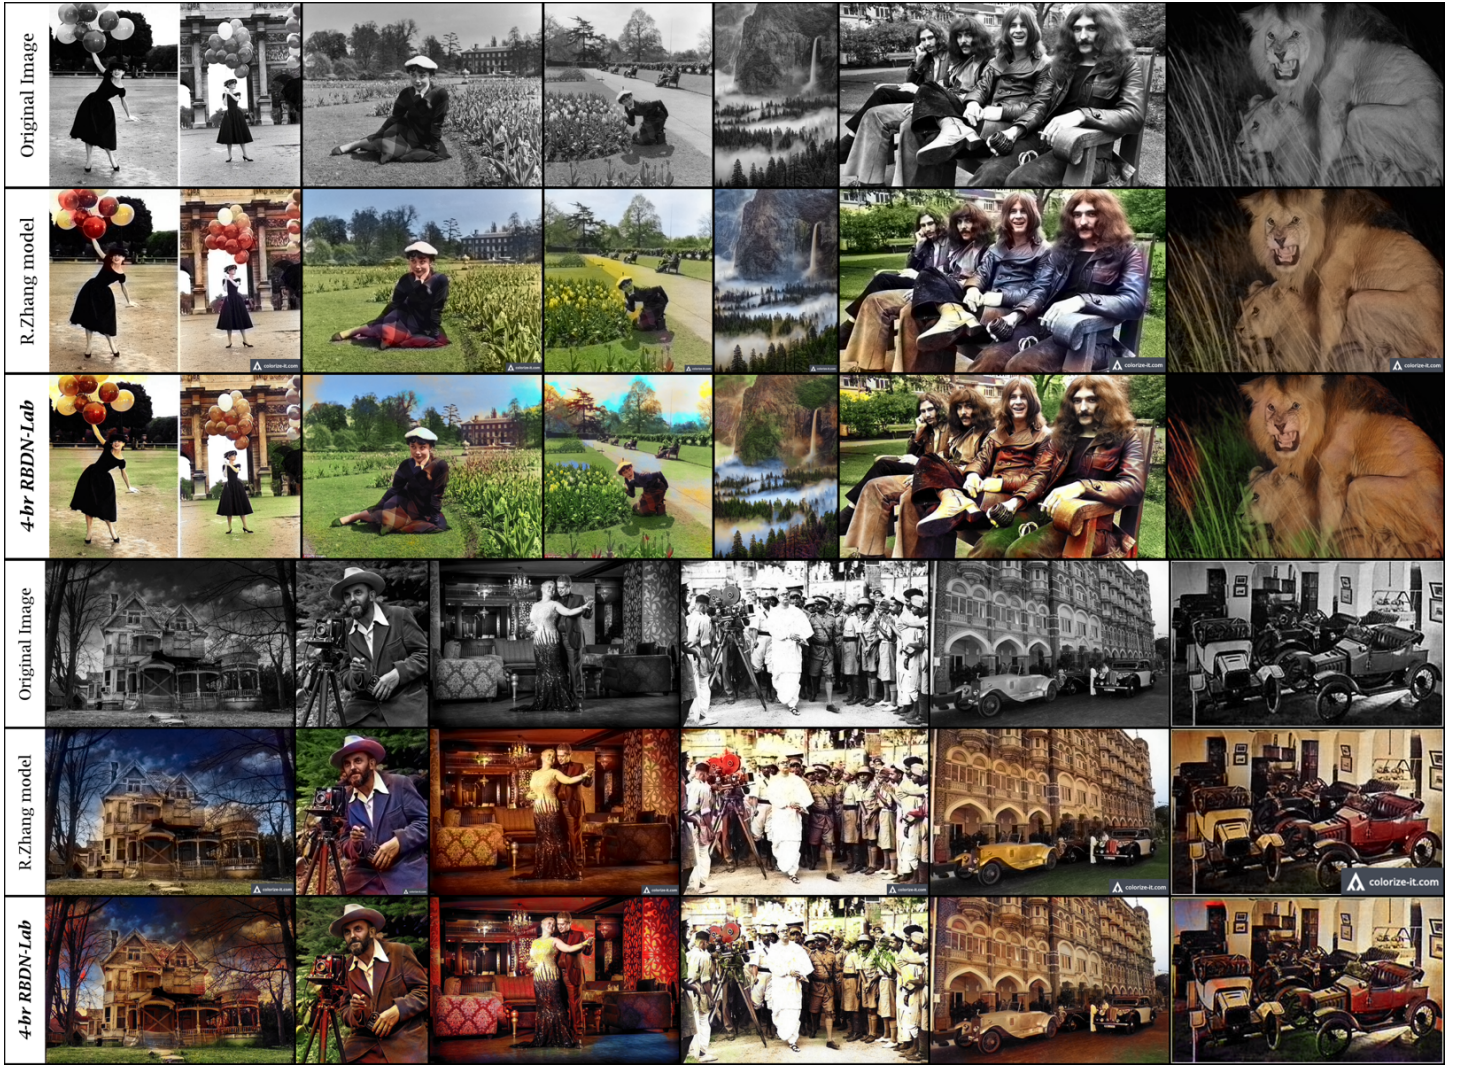

Figure 4: Colorizing legacy black-and-white photos: comparing 4-branch RBDN-Lab with the Colorful Colorization model of R.Zhang et al [5]



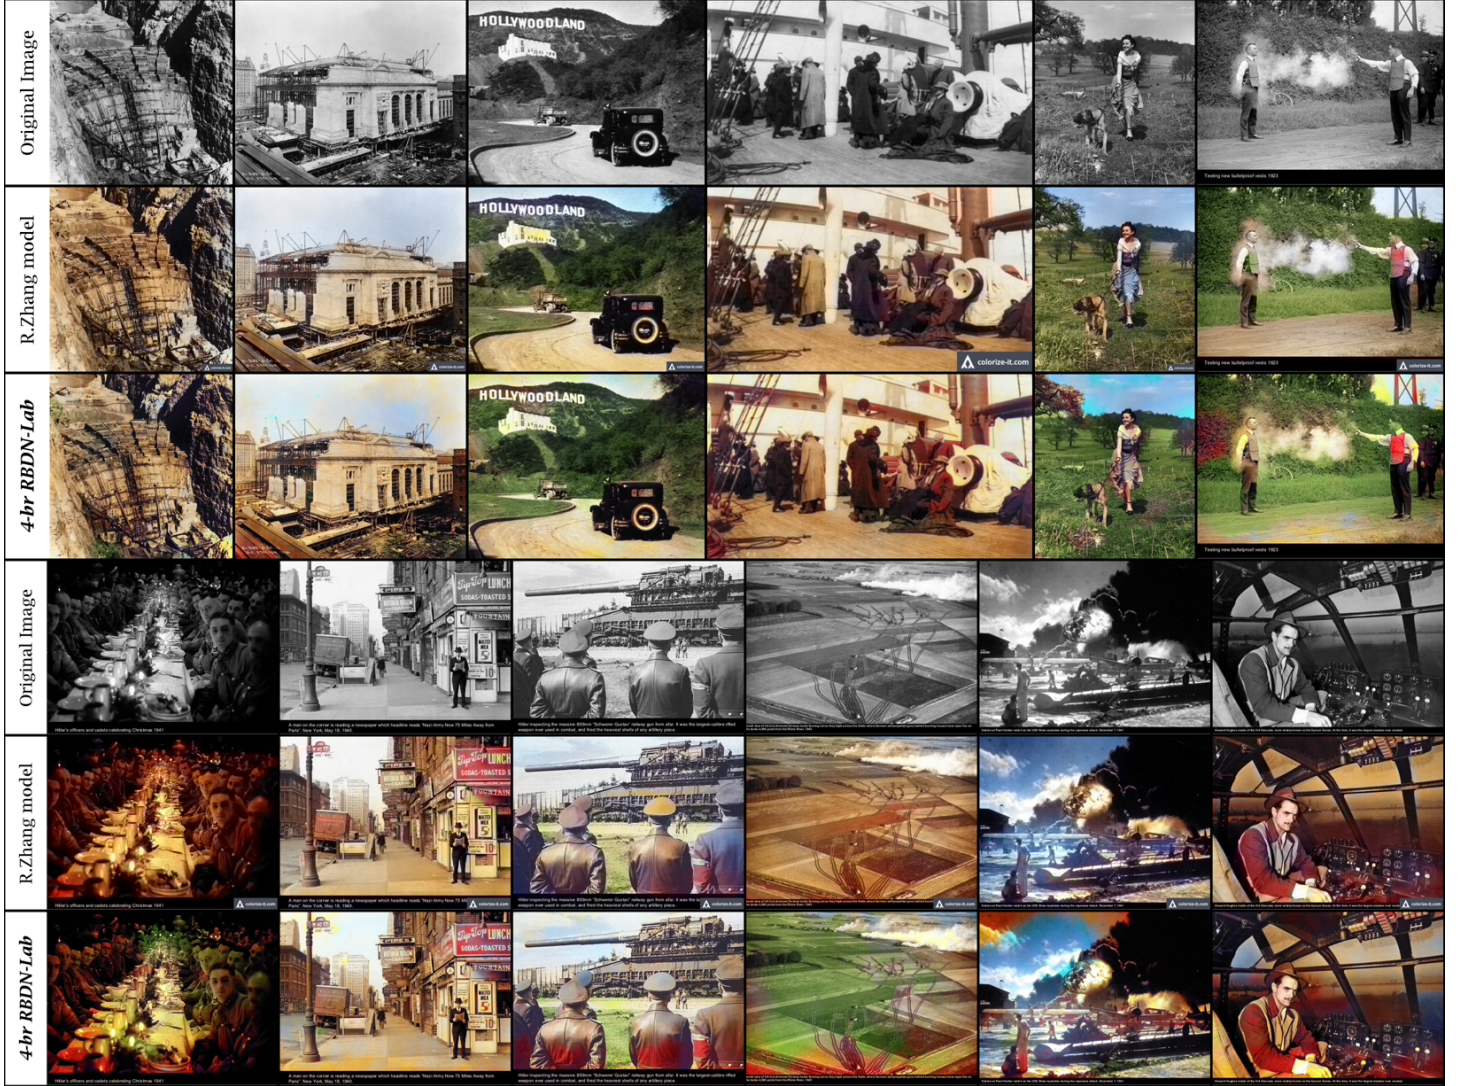

Figure 5: Colorizing legacy black-and-white photos: comparing 4-branch RBDN-Lab with the Colorful Colorization model of R.Zhang et al [5]



## References

- [1] Kai Zhang, Wangmeng Zuo, Yunjin Chen, Deyu Meng, and Lei Zhang. Beyond a gaussian denoiser: Residual learning of deep cnn for image denoising. *arXiv preprint arXiv:1608.03981*, 2016. 1, 2
- [2] Pablo Arbelaez, Charless Fowlkes, and David Martin. The berkeley segmentation dataset and benchmark. see <http://www.eecs.berkeley.edu/Research/Projects/CS/vision/bsds>, 2007. 2
- [3] Brendan F Klare, Ben Klein, Emma Taborsky, Austin Blanton, Jordan Cheney, Kristen Allen, Patrick Grother, Alan Mah, Mark Burge, and Anil K Jain. Pushing the frontiers of unconstrained face detection and recognition: Iarpa janus benchmark a. In *2015 IEEE Conference on Computer Vision and Pattern Recognition (CVPR)*, pages 1931–1939. IEEE, 2015. 3
- [4] Ralph Gross, Iain Matthews, Jeffrey Cohn, Takeo Kanade, and Simon Baker. Multi-pie. *Image Vision Comput.*, 28(5):807–813, May 2010. 3
- [5] Richard Zhang, Phillip Isola, and Alexei A Efros. Colorful image colorization. *arXiv preprint arXiv:1603.08511*, 2016. 4, 5
